# Supplementary material for: SH2 Domain-Containing Phosphatase-SHP2 Attenuates Fibrotic Responses through Negative Regulation of Mitochondrial Metabolism in Lung Fibroblasts
Source: MDPI journal article supplement (doi:10.3390/diagnostics13061166), 2023-03-18
Supplement: s1 [file s1]

## Supplemental data

### **SH2 domain-containing phosphatase-SHP2 attenuates fibrotic responses through negative regulation of mitochondrial metabolism in lung fibroblasts**

**Supplemental Data S1 (Figure 1).** SHP2 D61G/+ constitutively active mutant negatively regulates fibroblast migration, myofibroblast differentiation and proliferation. A) Primary mouse lung fibroblasts (MLF) from SHP2D61G/+ (constitutively active mutants) and SHP2+/+ mice were seeded in 24-well plates at  $2 \times 10^5$  cells/mL and incubated for 24h. After cells reached 100% confluence, wounds were generated using a 1 mL micropipette tip. Media was removed, cells washed with 500  $\mu$ L PBS, and 500  $\mu$ L of complete culture media added into each well. Images were acquired immediately following media replacement (T = 0), and every 6 h for 24 h via multi-mode plate reader at 10 $\times$ . After exporting images, wound areas were measured using ImageJ. B) Extents of closure at T6, T12, T18, and T24 were calculated by subtracting area at T0; percentage closure was determined by normalizing difference to area at T0. SHP2 D61G/+ constitutively active mutant lung fibroblasts exhibited significantly reduced cell migration at all time points (T0-T24, 2-fold) compared to wild type ones (SHP2+/+). One way ANOVA, \* $p < 0.05$ . Data represent mean + SD of 6 samples (biological replicates). C) Double immunofluorescence analysis in representative primary MLF samples showing decrease in TGFB1-induced  $\alpha$ -SMA (red) and stress fibers as indicated by phalloidin green (merged-yellow) in SHP2 D61G/+ constitutively active mutant lung fibroblasts compared to wild type ones (SHP2+/+). D) Primary mouse lung fibroblasts (MLF) from SHP2D61G/+ (constitutively active mutants) and SHP2+/+ mice were stimulated with PDGF-BB (25ng/ml) or mock (PBS) for 6 hrs. PDGF-BB stimulation induced a significant increase (1.4-fold) in proliferation rates of SHP2+/+ MLFs compared to the SHP2D61G/+ constitutively active mutants. Each bar represents mean expression of 6 samples (biological replicates). Data (absorbance) represent mean + SD. One way ANOVA, \* $p < 0.05$ .

**Supplemental Data S2 (Figure 2).** SHP2 D61G/+ constitutively active mutant mouse lung fibroblasts (MLFs) display increased expression of autophagy markers, swollen mitochondria with disrupted cristae and increased number of autophagosomes. A) Transmission Electron microscopy (TEM) of SHP2 D61G/+ constitutively active mutant MLFs compared to wild type ones (SHP2+/+) before and after treatment with TGFB1 (10ng/ml for 6 hrs) showed that SHP2 constitutive activation was associated with increased number of autophagosomes and swollen mitochondria with disrupted, electro-lucent cristae (white arrows-insets). Note the shrunk cytoplasm and the absence of extracellular matrix production in SHP2 D61G/+ constitutively active mutants which is evident in wild type MLFs ((SHP2+/+) (white arrow heads), following treatment with TGFB1. Representative images of 6 samples (biological replicates). B) Immunoblot analyses of autophagy markers (LC3BI/II) and autophagy receptor (p62) showed a LC3B<sup>high</sup>p62<sup>low</sup> immunoblot pattern in SHP2 D61G/+ constitutively active mutant MLFs compared to wild type ones (SHP2+/+), indicating increased autophagy. C) Double immunofluorescence analysis in MLFs validated immunoblot results showing co-localization (yellow-merged) of autophagy marker LC3B (green) with mitotracker (red stain of active mitochondria) in SHP2 D61G/+ constitutively active mutant MLFs. D) Surprisingly immunoblot analysis of PINK1 (mediator of effective autophagy) showed decreased expression in SHP2 D61G/+ constitutively active mutant MLFs compared to wild type ones (SHP2+/+), potentially indicating ineffective autophagy. E) Immunoblot densitometry analysis of LC3BI/II, p62 and PINK1 normalized to  $\beta$ -actin. Data are presented as bar graphs. Each bar represents an individual lane.

**Supplemental Data S3 (Figure 3).** SHP2 D61G/+ constitutively active mutant mouse lung fibroblasts exhibit impaired mitochondrial function with increased ROS production. A) Mitochondrial function SHP2 D61G/+ constitutively active mutant mouse lung fibroblasts (MLFs) in cultured SHP2 D61G/+ constitutively active mutant MLFs compared to wild type ones (SHP2+/+). (B) Maximum respiration, (pmol/min) was measured under basal conditions followed by addition of oligomycin, FCCP, rotenone and antimycin as indicated, \* $P < 0.05$ . C) Coupling efficiency (ATP production/proton leak), a measure of effective mitochondrial metabolism in SHP2 D61G/+ constitutively active mutant MLFs compared to wild type ones (SHP2+/+). D) Reactive oxygen species (ROS) were measured using the probe 5-(and-6)-chloromethyl-2',7'-dichlorodihydrofluorescein diacetate acetyl ester (CM-H2DCFDA). Compared to wild type ones, D61G cells show a 1.6-fold increased fluorescence indicating significantly increased ROS levels. Note that SHP2 D61G/+ constitutively active MLFs were characterized by reduced MMP levels (1.3-fold), maximum respiration (oxygen consumption rate) (1.86 fold) and coupling efficiency (1.9-fold) indicating ineffective mitochondrial metabolism potentially resulting to increased ROS (1.6-fold) compared to wild type ones. Data are presented as bar graphs with horizontal bars representing mean mitochondrial membrane potential (MMP) levels (green/red fluorescence ratio)  $\pm$  SEM, of 6 samples (biological replicates). Independent samples Student's t-test, \* $P < 0.05$ .

**Supplemental Data S4 (Figure 4).** SHP2 positively regulates phosphorylation states of autophagy-related and negatively regulates mTORC1 signaling pathways. A) Autophagy signaling pathway: Upper panel: Immunoblot analyses for p-AMPK- $\alpha$ 1/ $\alpha$ 2 and total AMPK- $\alpha$ 1/ $\alpha$ 2 at different time-points (0, 30, 60 min) following TGFB1 stimulation (10ng/ml). Note that SHP2 constitutive activation augments TGFB1-induced phosphorylation of AMPK $\alpha$ 1/ $\alpha$ 2 while baseline SHP2 expression leads to dephosphorylation of AMPK serine/threonine kinase complex. Lower panel: Immunoblot analyses for p-Ulk-1-ser317, p-Ulk1-ser757 and total Ulk-1 at different time-points (0, 30, 60 min) following TGFB1 stimulation (10ng/ml). Each lane represents an individual cell preparation. Note that SHP2-induced AMPK activation led to enhanced phosphorylation of Ulk-1 at serine 317 while dephosphorylated Ulk-1 at serine 757. B) mTORC1 signaling pathway: Upper panel: Immunoblot analyses for p-Akt1 and total Akt1 at different time-points (0, 30, 60 min) following TGFB1 stimulation (10ng/ml). Lower panel: Immunoblot analyses for p-P70S6K1 and total P70S6K1 at different time-points (0, 30, 60 min) following TGFB1 stimulation (10ng/ml). SHP2 constitutive activation in DG1G+ mutants was associated with reduced TGFB1-induced phosphorylation of Akt-1 and p-P70S6K1, indicating inhibition of mTORC1 signal transduction pathway. Each lane represents an individual cell preparation. C) Immunoblot densitometry analysis of p-AMPK- $\alpha$ 1/ $\alpha$ 2 normalized to total AMPK- $\alpha$ 1/ $\alpha$ 2, p-Ulk-1-ser317, p-Ulk1-ser757 normalized to total Ulk-1, p-Akt-1 normalized to total Akt-1 and p-P70S6K1 normalized to total P70S6K1. Data are presented as bar graphs. Each bar represents an individual lane.
